# Supplementary material for: Structural Basis for the Regiospecificity of a Lipase from Streptomyces sp. W007
Source: MDPI journal article supplement (doi:10.3390/ijms23105822), 2022-05-22
Supplement: s1 [file s1]

# Supporting Information

## **Structural basis for the regiospecificity of a lipase from *Streptomyces* sp.**

### **W007**

Zexin Zhao<sup>1</sup>, Siyue Chen<sup>2</sup>, Long Xu<sup>3</sup>, Jun Cai<sup>1</sup>, Jia Wang<sup>4,\*</sup> & Yonghua Wang<sup>2,5,\*</sup>

<sup>1</sup> Key Laboratory of Fermentation Engineering (Ministry of Education), Hubei Key Laboratory of Industrial Microbiology, Hubei University of Technology, Wuhan 430068, PR China

<sup>2</sup> School of Food Science and Engineering, South China University of Technology, Guangzhou 510640, PR China

<sup>3</sup> College of Food Science and Technology, Henan Agricultural University, Zhengzhou 450002, PR China

<sup>4</sup> College of Life Science, Guangzhou University, Guangzhou 510006, PR China

<sup>5</sup> Guangdong Youmei Institute of Intelligent Bio-manufacturing, Foshan 528225, PR China

\* To whom correspondence should be addressed:

Prof. Yonghua Wang      E-Mail: yonghw@scut.edu.cn

Dr. Jia Wang              E-mail: jiawang@gzhu.edu.cn

Supplementary Figures & Tables

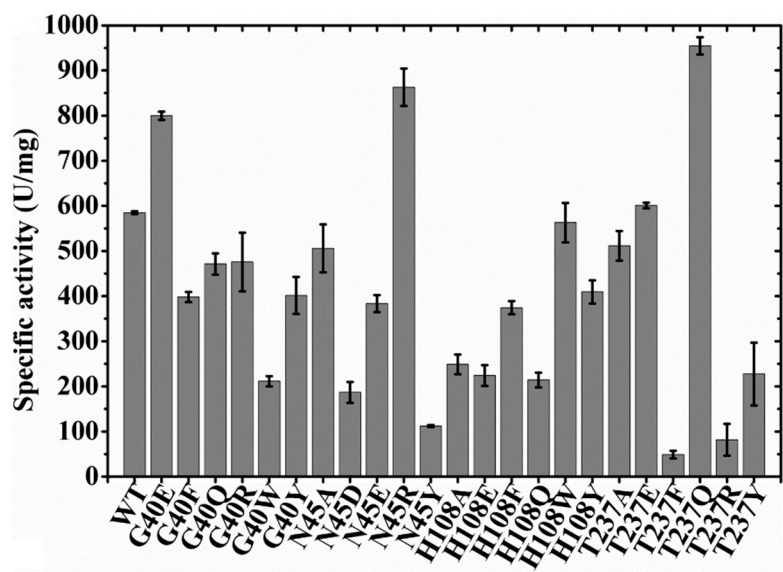

**Figure S1.** Specific activity of MAS1 and its mutants.

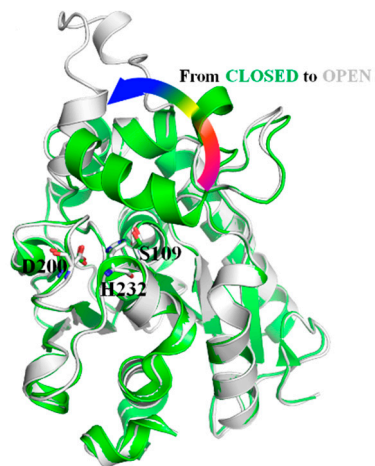

**Figure S2.** The superimposition of MAS1 in closed and open conformation.

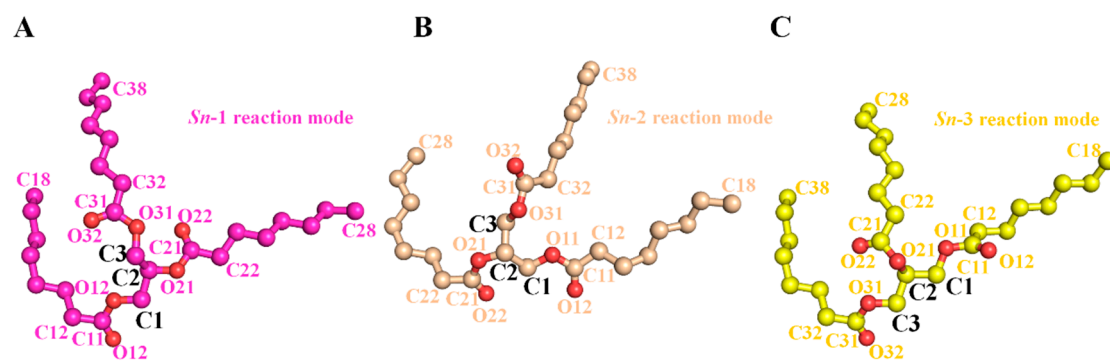

**Figure S3.** Atom numbering of TC in the (A) *sn*-1, (B) *sn*-2 and (C) *sn*-3 reaction modes, respectively.

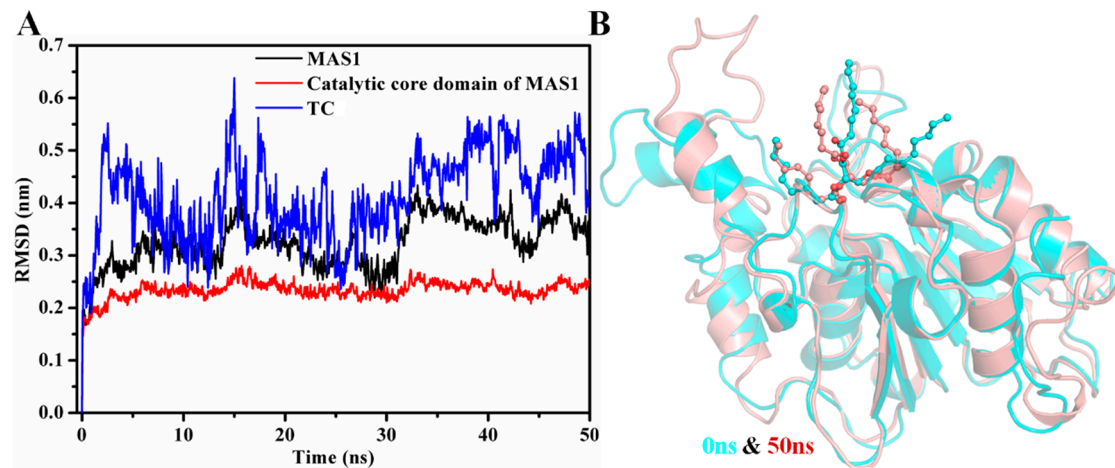

**Figure S4.** The analysis of MD simulation of MAS1. **(A)** The RMSD variation analysis.

**(B)** Overall structural comparison between the initial and final models.

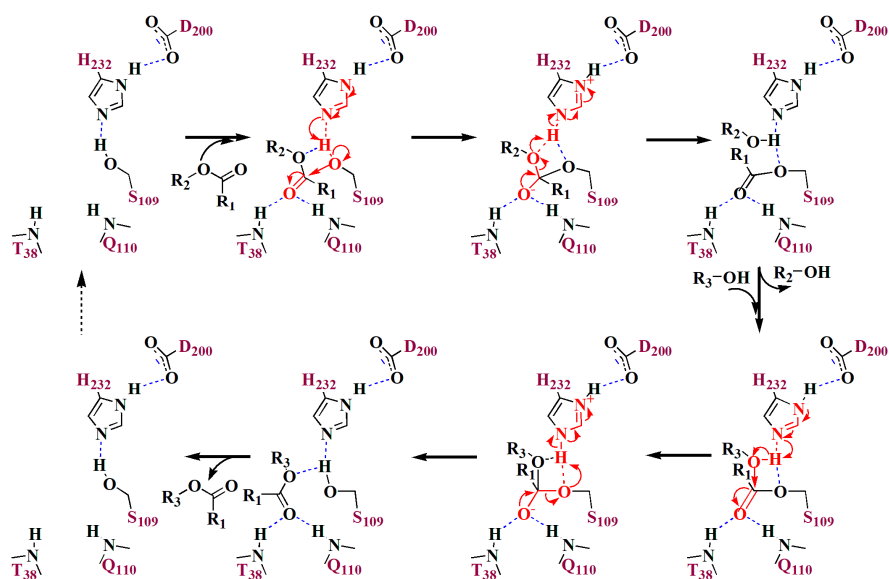

**Figure S5.** The reaction mechanism of acyl transformation catalyzed by MAS1 (It was hydrolysis process, when R<sub>3</sub> was set as H).

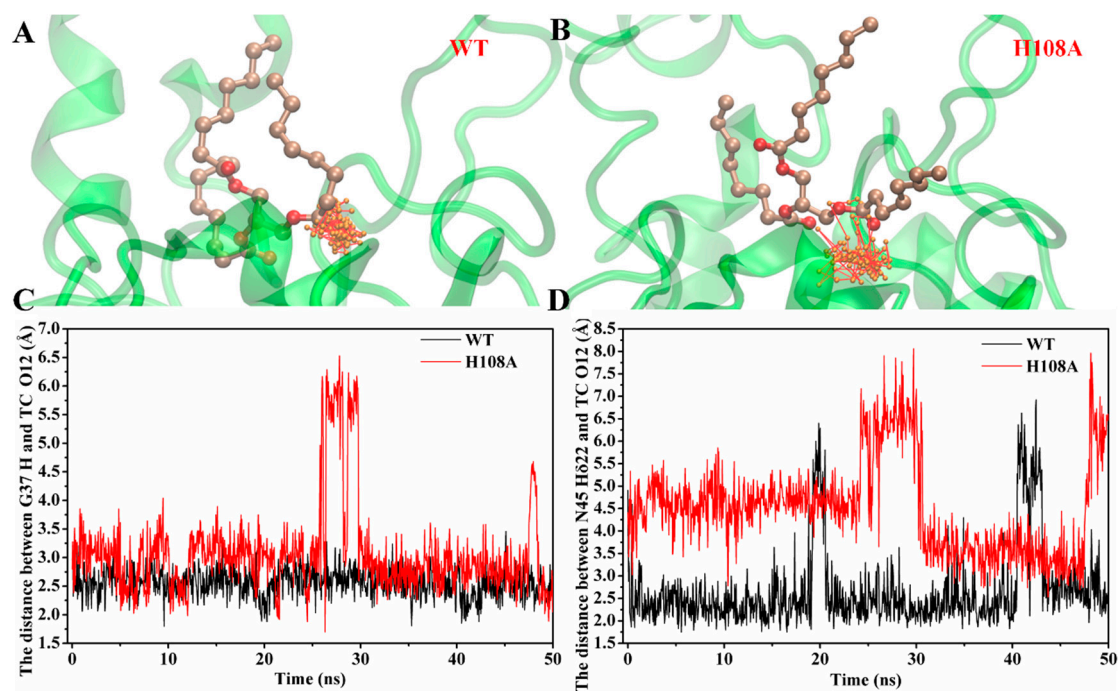

**Figure S6.** The comparison of binding stability of MAS1 and H108A with *sn*-1 moiety of TC. The track of TC O12 in **(A)** wild-type and **(B)** H108A models. The track was presented as gold balls connected by red line. **(C-D)** The distance fluctuation analysis.

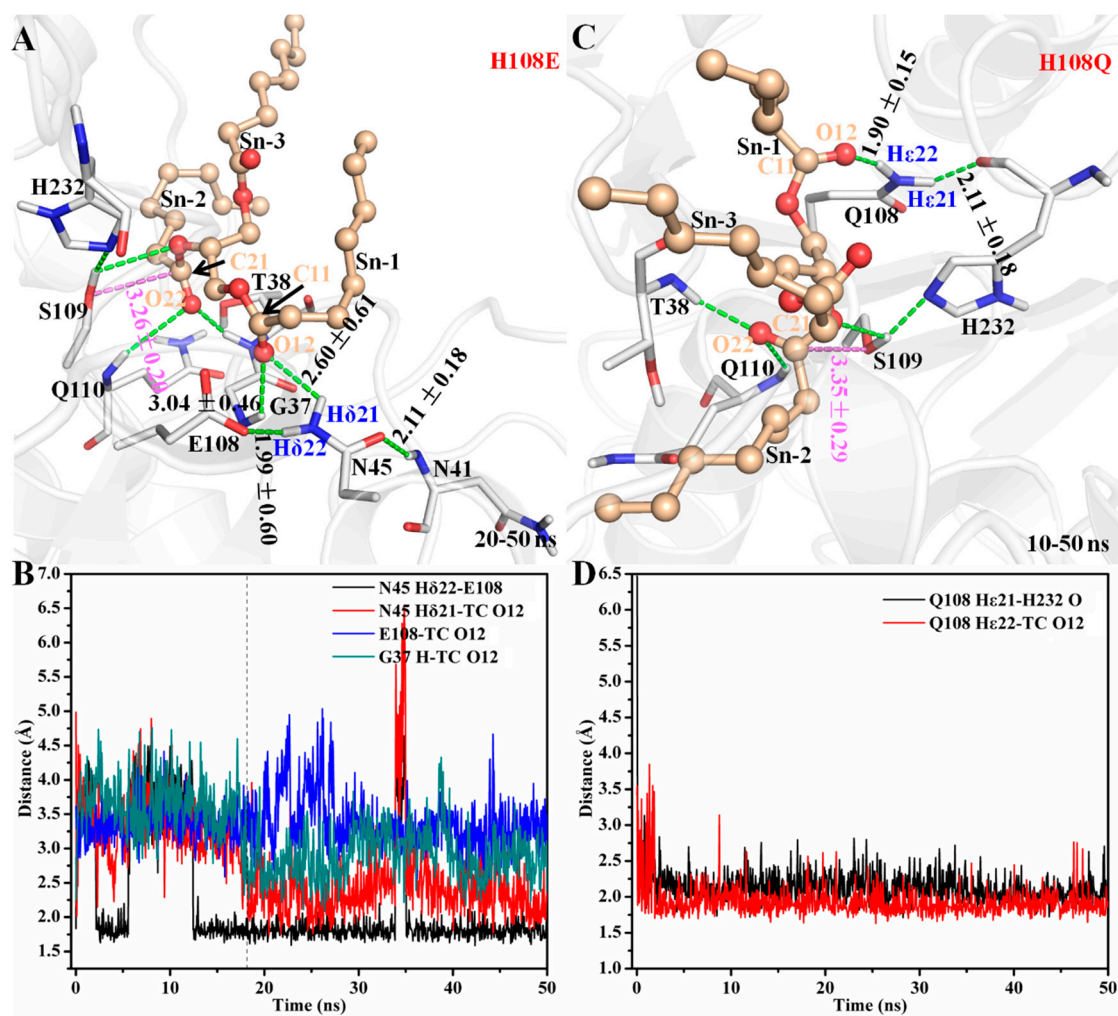

**Figure S7.** The comparison of computational results of mutants H108E and H108Q. The substrate binding conformation of mutants (A) H108E and (C) H108Q model in balanced phase of MD simulation. The distance fluctuation analysis of mutants (B) H108E and (D) H108Q.



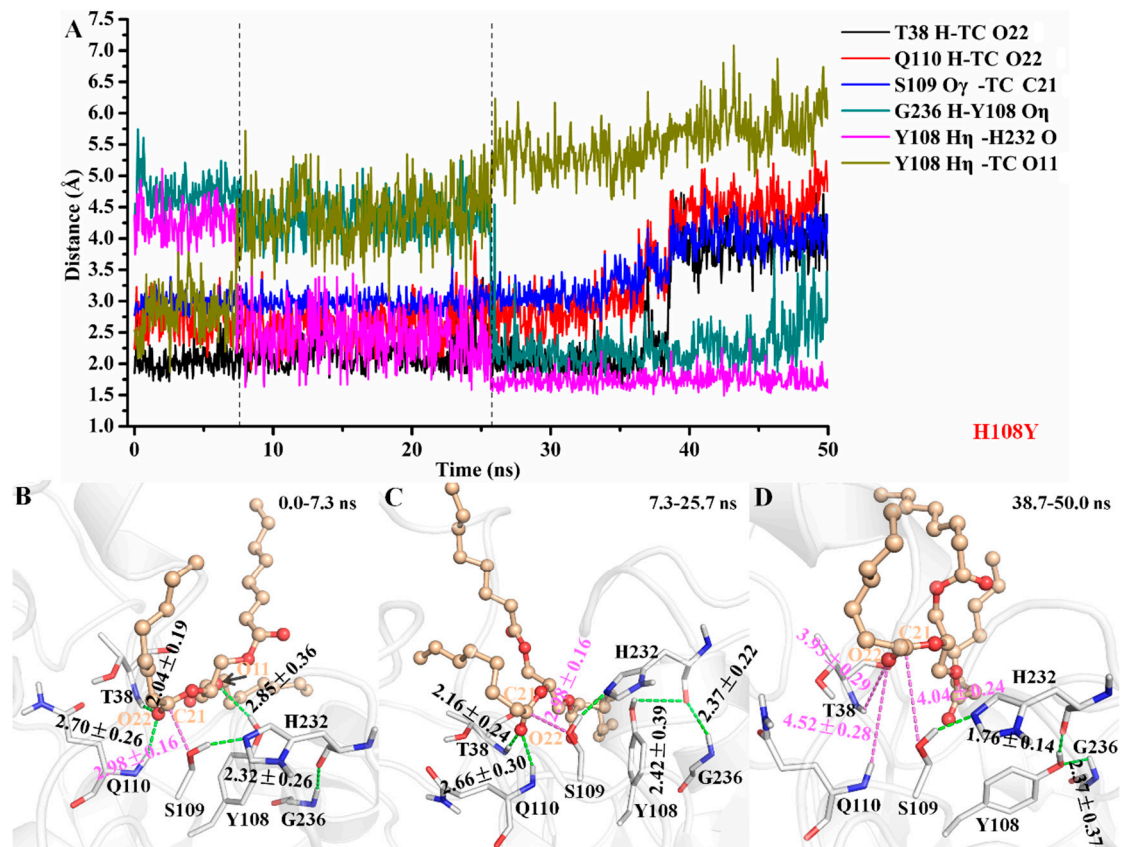

**Figure S8.** The computational results of mutant H108Y. **(A)** The distance fluctuation analysis. **(B-D)** Substrate binding conformation in different phases of MD simulation.

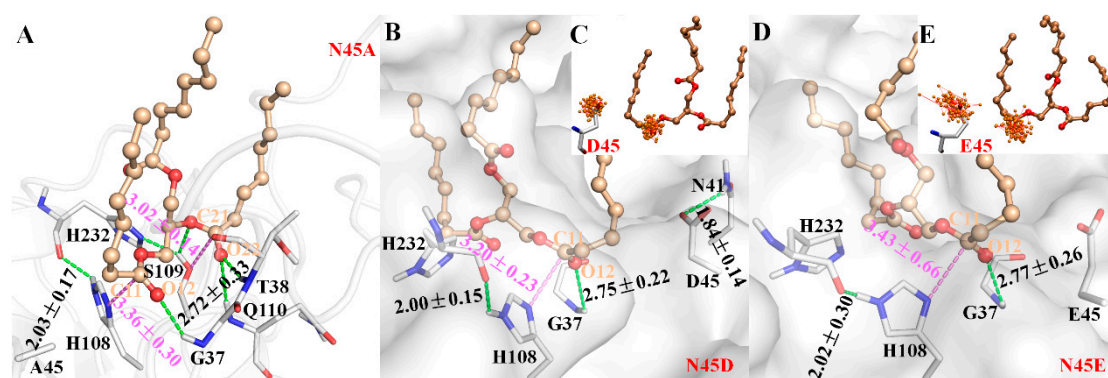

**Figure S9.** The comparison of computational results of mutants N45A, N45D and N45E. The substrate binding conformation of mutants (A) N45A, (B) N45D and (D) N45E. The trajectory of TC O12 and carboxyl carbon of introduced residue in mutants (C) N45D and (E) N45E. The trajectory was presented as gold balls connected by red line.

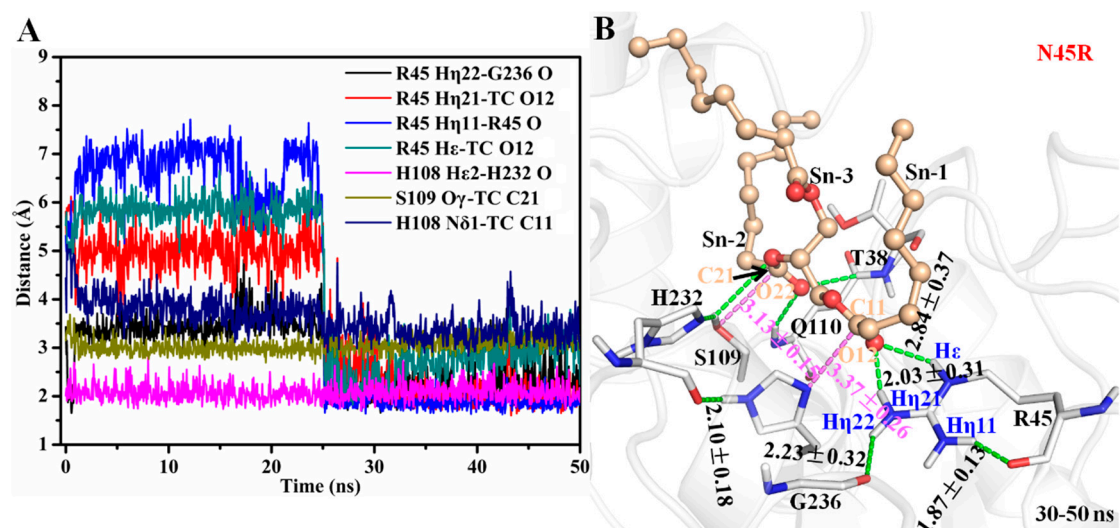

**Figure S10.** The computational results of mutant N45R. **(A)** The distance fluctuation analysis. **(B)** Substrate binding conformation in balanced phases of MD simulation.

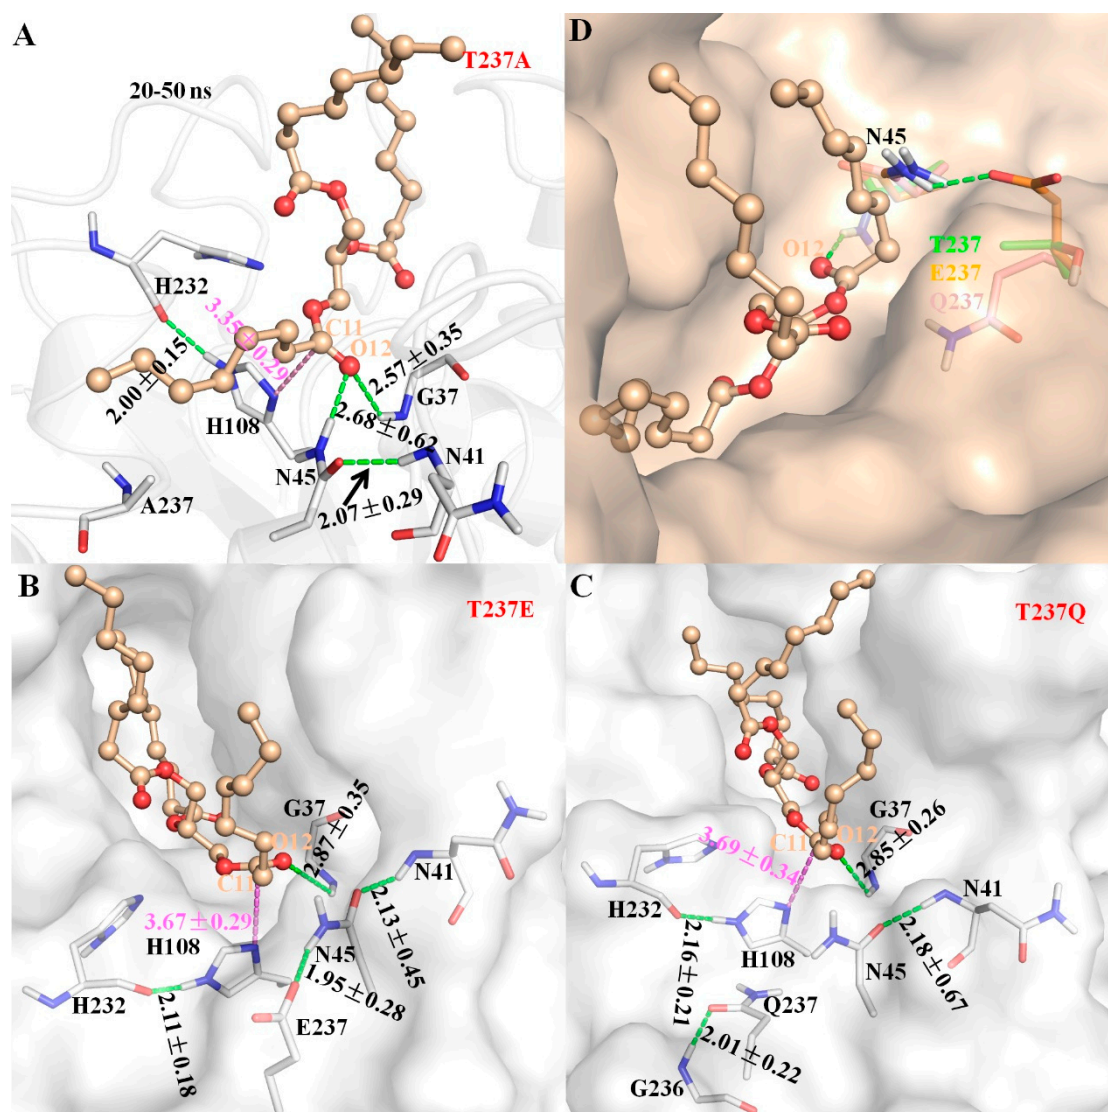

**Figure S11.** The comparison of computational results of mutants T237A, T237E and T237Q. The substrate binding conformation of mutants (A) T237A, (B) T237E and (C) T237Q. (D) The structural alignment of wild-type MAS1 and its mutants T237E and T237Q. The wild type was showed as wheat surface representation.

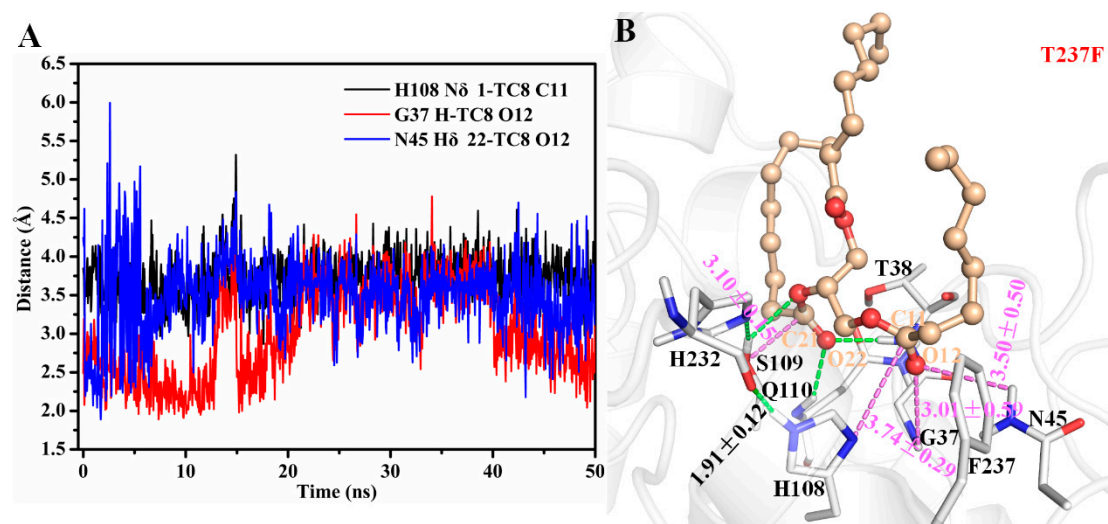

**Figure S12.** The computational results of mutant T237F. **(A)** The distance fluctuation analysis. **(B)** Substrate binding conformation during MD simulation.

**Table S1.** Primers list of vector exchange and mutants construction.

| Primer name                | Sequence(5'→3')                                   |
|----------------------------|---------------------------------------------------|
| Pet22b-mas1 F <sup>a</sup> | <b>TTAATTCGGATCCGAATTCG</b> GCCACGCCAGCTGCTGAG    |
| Pet22b-mas1 R <sup>a</sup> | <b>TGGTGGTGGTGGTCTCGAG</b> GCCAATCACAGAAGCACAGGTT |
| G40E_F                     | GTACATGGCACCTTCGAGAACTCAATTGACAACTG               |
| G40E_R                     | CAGTTGTCAATTGAGTTCTCGAAGGTGCCATGTAC               |
| G40F_F                     | CTTGTACATGGCACCTTCTTAACTCAATTGACAACTGG            |
| G40F_R                     | CCAGTTGTCAATTGAGTTAAAGAAGGTGCCATGTACAAG           |
| G40Q_F                     | CTTGTACATGGCACCTTCCAAAACCTCAATTGACAACTGGC         |
| G40Q_R                     | GCCAGTTGTCAATTGAGTTTGGAAAGGTGCCATGTACAAG          |
| G40R_F                     | AGTTGTCAATTGAGTTACGGAAGGTGCCATGTACAAG             |
| G40R_R                     | CTTGTACATGGCACCTTCCGTAACCTCAATTGACAACT            |
| G40W_F                     | TCTTGTACATGGCACCTTCTGGAACCTCAATTGACAACTGGC        |
| G40W_R                     | GCCAGTTGTCAATTGAGTTCCAGAAGGTGCCATGTACAAGA         |
| G40Y_F                     | CTTGTACATGGCACCTTCTATAACTCAATTGACAACTGG           |
| G40Y_R                     | CCAGTTGTCAATTGAGTTATAGAAGGTGCCATGTACAAG           |
| N45A_F                     | CTTCGGTAACTCAATTGACGCCTGGCTTGTTTTGGCTCCA          |
| N45A_R                     | TGGAGCCAAAACAAGCCAGGCGTCAATTGAGTTACCGAAG          |
| N45D_F                     | GAGCCAAAACAAGCCAGTCGTCATTGAGTTACCGAA              |
| N45D_R                     | TTCGGTAACTCAATTGACGACTGGCTTGTTTTGGCTC             |
| N45E_F                     | ATGGAGCCAAAACAAGCCACTCGTCAATTGAGTTACCGAAG         |
| N45E_R                     | CTTCGGTAACTCAATTGACGAGTGGCTTGTTTTGGCTCCAT         |
| N45F_F                     | TGGAGCCAAAACAAGCCAGAAGTCAATTGAGTTACCGAAG          |
| N45F_R                     | CTTCGGTAACTCAATTGACTTCTGGCTTGTTTTGGCTCCA          |
| N45R_F                     | GCCAAAACAAGCCACCTGTCAATTGAGTTACCGAAGGTGCCA        |
| N45R_R                     | TGGCACCTTCGGTAACTCAATTGACAGGTGGCTTGTTTTGGC        |
| N45Y_F                     | CCTTCGGTAACTCAATTGACTATTGGCTTGTTTTGGCTCCATA       |
| N45Y_R                     | TATGGAGCCAAAACAAGCCAATAGTCAATTGAGTTACCGAAGG       |
| S109A_F                    | GATCTGGTTCGGTCACGCCCAAGGTGGTATGATG                |
| S109A_R                    | CATCATACCACCTTGGGCGTGACCGACCAGATC                 |
| H108A_F                    | CAAGGCTGATCTGGTCGGTGCCAGTCAAGGTGGTATGATG          |
| H108A_R                    | CATCATACCACCTTGACTGGCACCGACCAGATCAGCCTTG          |
| H108E_F                    | CATACCACCTTGACTCTCACCGACCAGATCAGCCT               |
| H108E_R                    | AGGCTGATCTGGTCGGTGAGAGTCAAGGTGGTATG               |
| H108F_F                    | CATCATACCACCTTGACTGAAACCGACCAGATCAGCCTTG          |
| H108F_R                    | CAAGGCTGATCTGGTCGGTTTCAGTCAAGGTGGTATGATG          |
| H108Q_F                    | CCACCTTGACTCTGACCGACCAGATCAGCC                    |
| H108Q_R                    | GGCTGATCTGGTCGGTCAGAGTCAAGGTGG                    |
| H108R_F                    | CATACCACCTTGACTGCGACCGACCAGATCAGC                 |
| H108R_R                    | GCTGATCTGGTCGGTCGCAGTCAAGGTGGTATG                 |
| H108W_F                    | CAAGGCTGATCTGGTCGGTTGGAGTCAAGGTGGTATGATG          |
| H108W_R                    | CATCATACCACCTTGACTCCAACCGACCAGATCAGCCTTG          |
| H108Y_F                    | CATCATACCACCTTGACTATAACCGACCAGATCAGCCTTGG         |
| H108Y_R                    | CCAAGGCTGATCTGGTCGGTTATAGTCAAGGTGGTATGATG         |
| H232A_F                    | GTGGATTTGTCAGAAGCCGTAGCCATCGGAAC                  |
| H232A_R                    | GTTCCGATGGCTACGGCTTCTGACAAATCCAC                  |
| T237A_F                    | AGCTATCCTATCGATAGCTCCGATGGCTACGTGTT               |
| T237A_R                    | AACACGTAGCCATCGGAGCTATCGATAGGATAGCT               |
| T237E_F                    | GAACACGTAGCCATCGGAGAAATCGATAGGATAGCTTTTC          |
| T237E_R                    | GAAAAGCTATCCTATCGATTCTCCGATGGCTACGTGTTTC          |
| T237F_F                    | GAAAAGCTATCCTATCGATAAATCCGATGGCTACGTGTTCTG        |
| T237F_R                    | CAGAACACGTAGCCATCGGATTTATCGATAGGATAGCTTTTC        |
| T237Q_F                    | GAACACGTAGCCATCGGACAAATCGATAGGATAGCTTTTC          |
| T237Q_R                    | GAAAAGCTATCCTATCGATTGTCCGATGGCTACGTGTTTC          |
| T237R_F                    | AAAGCTATCCTATCGATCCTCCGATGGCTACGTGTTCTGA          |
| T237R_R                    | TCAGAACACGTAGCCATCGGAAGGATCGATAGGATAGCTTT         |
| T237Y_F                    | GAACACGTAGCCATCGGATACATCGATAGGATAGCTTTTC          |
| T237Y_R                    | GAAAAGCTATCCTATCGATGTATCCGATGGCTACGTGTTTC         |

<sup>a</sup> The homologous region of vector exchange primers were marked in red and the

restriction sites were underlined.
